# Supplementary material for: Deficiency of the myogenic factor MyoD causes a perinatally lethal fetal akinesia
Source: PubMed Central journal article supplement (PMC4819622; doi:10.1136/jmedgenet-2015-103620), 2016-01-05

**Supplementary Figure 1:** Sanger sequencing confirmation of the nextgeneration sequencing identified variant c.188C>A (NM\_002478.4) p.(Ser63\*). The variant was confirmed to be homozygous in all affected siblings and heterozygous in the unaffected mother and unaffected father II:3.

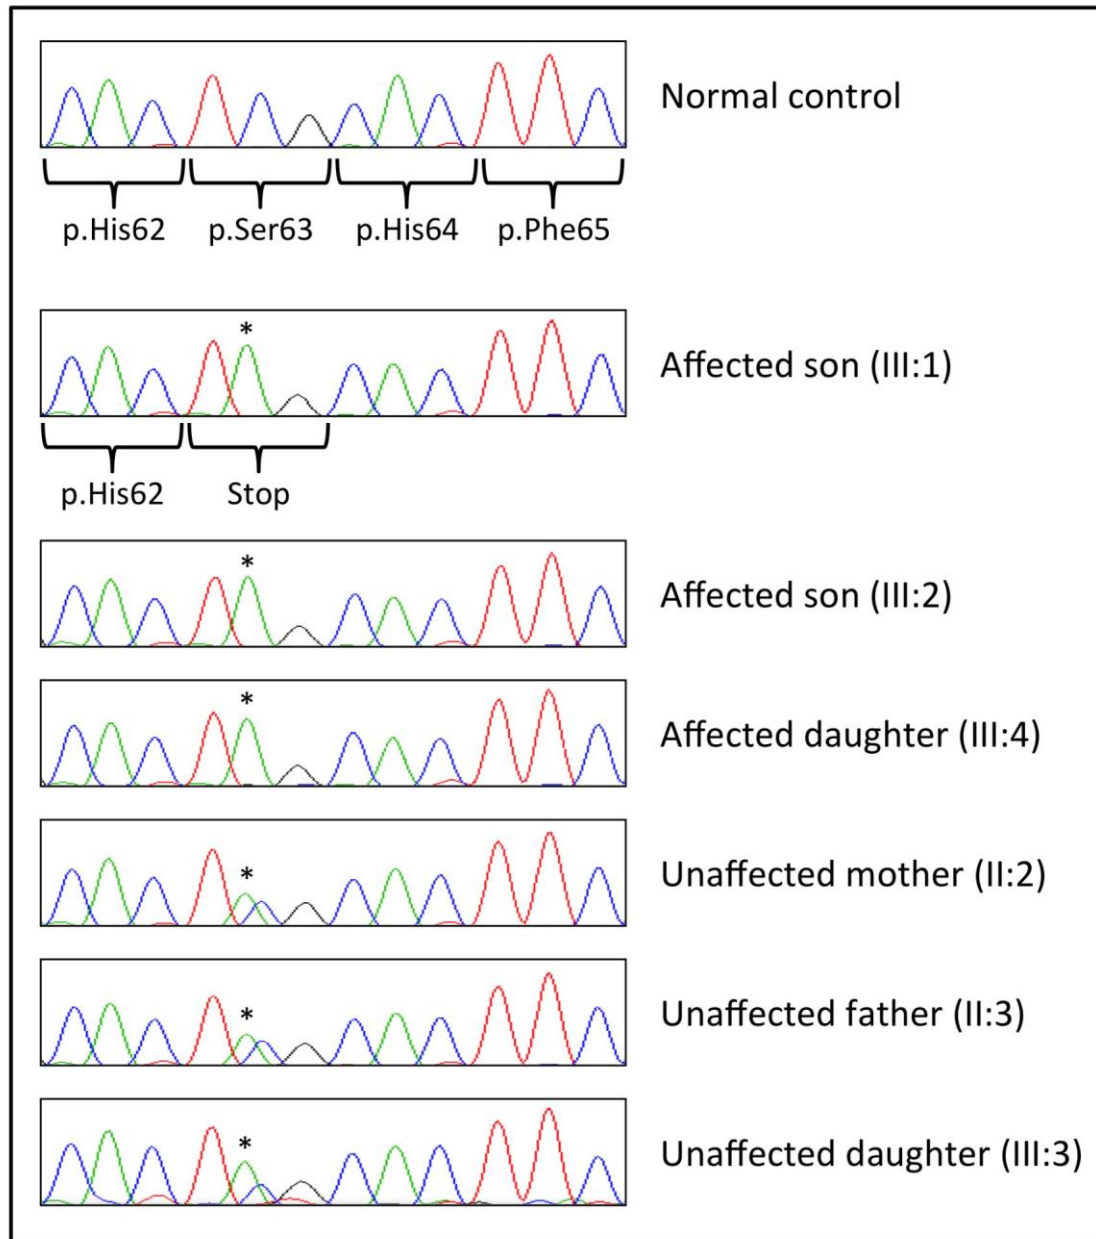

Supplement: jmedgenet-2015-103620-s1.pdf [file jmedgenet-2015-103620-s1.pdf]
