# Supplementary material for: Deficiency of the myogenic factor MyoD causes a perinatally lethal fetal akinesia
Source: PubMed Central journal article supplement (PMC4819622; doi:10.1136/jmedgenet-2015-103620), 2016-01-05
Supplement: jmedgenet-2015-103620-s2.pdf [file jmedgenet-2015-103620-s2.pdf]

**Supplementary Table 1: Sequencing summary metrics**

| Sample | Total raw reads | Adaptor trimmed reads (%) | Duplicate rate (%) | Mean insert size (bp) | Total mapped reads* | Exome mapped reads (%) | Percentage of target bases <sup>§</sup> sequenced |      |
|--------|-----------------|---------------------------|--------------------|-----------------------|---------------------|------------------------|---------------------------------------------------|------|
|        |                 |                           |                    |                       |                     |                        | ≥15×                                              | ≥30× |
| II:2   | 64,172,890      | 3.1                       | 9.8                | 208                   | 56,483,391          | 61.0                   | 96.0                                              | 86.0 |
| III:1  | 87,458,244      | 3.2                       | 11.1               | 199                   | 75,991,386          | 62.1                   | 97.8                                              | 93.4 |
| III:2  | 177,975,174     | 4.1                       | 11.9               | 184                   | 157,037,281         | 62.8                   | 98.3                                              | 96.6 |
| III:4  | 77,545,908      | 3.2                       | 14.1               | 200                   | 65,047,512          | 61.6                   | 96.7                                              | 89.0 |

\*Following duplicate removal. <sup>§</sup>Coding or invariant splice site nucleotides located in the autozygous region.

**Supplementary Table 2: MultiIdeogram-identified autozygous regions**

| Chromosome   | Start       | Stop        | Length (bp)       | Genes* (n) |
|--------------|-------------|-------------|-------------------|------------|
| 3            | 52,430,698  | 52,821,992  | 391,294           | 15         |
| 3            | 109,178,758 | 112,727,184 | 3,548,426         | 22         |
| 5            | 118,860,938 | 134,870,913 | 16,009,975        | 86         |
| 10           | 135,082,346 | 135,491,083 | 408,737           | 16         |
| 11           | 11,373,508  | 22,696,451  | 11,322,943        | 72         |
| <b>Total</b> |             |             | <b>31,681,375</b> | <b>211</b> |

\*UCSC coding genes. Coordinates reported for hg19.

**Supplementary Table 3: Homozygous filtered variants shared between three affected siblings and the zygosity status of the corresponding variants in their unaffected mother**

| RS number   | Chr | Position    | Gene          | Transcript     | c.Nomen, p.(Nomen)        | Unaffected mother II:2 |                                 |                  |
|-------------|-----|-------------|---------------|----------------|---------------------------|------------------------|---------------------------------|------------------|
|             |     |             |               |                |                           | Zygoty                 | Non-reference allele read depth | Total read depth |
| RS40470     | 5   | 132,150,948 | <i>SOWAHA</i> | NM_175873.4    | c.1635T>G, p.(Phe545Leu)  | Hom                    | 0                               | 93               |
| RS56359117  | 11  | 17,615,244  | <i>OTOG</i>   | NM_001277269.1 | c.3265A>G, p.(Ile1089Val) | Het                    | 4                               | 9                |
| RS147517396 | 11  | 17,741,517  | <i>MYOD1</i>  | NM_002478.4    | c.188C>A, p.(Ser63*)      | Het                    | 98                              | 197              |
| RS1136747   | 11  | 18,290,874  | <i>SAA1</i>   | NM_001178006.1 | c.224T>C, p.(Val75Ala)    | Hom                    | 25 <sup>†</sup>                 | 34               |

Chr: Chromosome. Hom: Homozygous. Het: Heterozygous. <sup>†</sup>: Manual inspection these data indicated the non-reference nucleotide containing reads were poor quality alignments whose sequence was derived from the *SAA1* pseudogene. The locus was therefore homozygous for the reference (T) nucleotide.
